# Supplementary material
Source: PubMed Central journal article supplement (PMC2692177)
Supplement: supp_72_23_2029__1.pdf [file supp_72_23_2029__1.pdf]

# 老年人群中认知功能保留的预测因素

## 健康ABC研究

### Predictors of maintaining cognitive function in older adults

#### The Health ABC Study

K. Yaffe, MD  
A.J. Fiocco, PhD  
K. Lindquist, MS  
E. Vittinghoff, PhD  
E.M. Simonsick, PhD  
A.B. Newman, MD  
S. Satterfield, MD  
C. Rosano, MD  
S.M. Rubin, MD  
H.N. Ayonayon, PhD  
T.B. Harris, MD  
For the Health ABC  
Study

Address correspondence and  
reprint requests to Dr. A.J.  
Fiocco, Department of  
Psychiatry, School of Medicine,  
University of California, San  
Francisco, 4150 Clement St.,  
San Francisco, CA 94117  
jazfiocco@hotmail.com

#### 摘要

背景：尽管与认知下降有关的一些危险因素已经被确认，但是我们对能够预测老年中认知功能保留的因素尚知之甚少。

方法：我们研究了一项前瞻性研究中所纳入的 2509 名功能正常的黑种和白种老年人。我们采用改良版简易精神状态量表 (Mini-Mental State Examination) 分别在基线、第 3 年、第 5 年和第 8 年评价认知功能。我们采用随机效应模型将受试者分为：认知保留者 (认知改变斜率  $\geq 0$ )，轻度认知下降者 (认知改变斜率  $< 0$  且  $>$  均数下 1 SD)，或重度认知下降者 (认知改变斜率  $\leq$  均数下 1 SD)。采用 Logistic 回归分析来确认那些与认知保留和认知轻度下降相关的因素。

结果：在 8 年期间，30% 的受试者认知功能得到保留，53% 出现轻度认知下降，16% 有重度的认知下降。在多因素模型中，认知保留者和轻度认知下降者相比，具有显著相关性的基线变量包括：年龄 (OR 值 = 0.65, 95% CI: 0.55-0.77/5 年)、白种人 (OR=1.72, 95% CI: 1.30-2.28)、高中教育水平或更高 (OR=2.75, 95% CI: 1.78-4.26)、第 9 级读写能力或更高 (OR=4.85, 95% CI: 3.00-7.87)、每周中/高强度的锻炼 (OR=1.31, 95% CI: 1.06-1.62) 以及不吸烟 (OR=1.84, 95% CI: 1.14-2.97)。与轻度认知下降相比，重度认知下降的相关因素已经报道。

结论：与轻度认知下降者不同，那些认知功能保留的老年人具有独特的特点。重要的还在于，这些因素中有些是可以改变的，因此可能可以在促进健康认知老龄化的预防措施中落实。此外，与认知保留相关的因素可能不同于那些与重度认知下降有关的因素。这可能对预防和治疗策略产生影响。

NEUROLOGY 2009;72:2029-2035 张静林译；宋海庆校

#### 缩略词：

3MS= 改良版简易精神状态量表；BMI= 身体质量指数；CES-D= 流调中心抑郁量表；CI= 置信区间；CRP= C 反应蛋白；Health ABC= 健康、老龄化和躯体组成；IL= 白介素；MI= 心肌梗死；OR= 比值比；REALM= 成人读写能力快速评估的医学测试；TNF= 肿瘤坏死因子

健康老龄化概念的第一次引入是为了探究这样一种假说：老龄化并不一定伴有典型的与年龄相关的功能下降<sup>[1]</sup>。在过去的几十年中，几个方面的研究都在努力去定义和预测健康老龄化<sup>[2]</sup>。然而，这些研究中许多由于中枢神经功能的评价而受限制，包括认知功能的评价。既往关于健康老龄化的研究一般都集中在对身体健康的研究，而没有考虑到认知能力<sup>[3]</sup>。少数将认知功能整合在健康老龄化的概念框架中的研究曾建议，定义需除临床缺损，如痴呆。但是，这些研究却没能明确最佳认知老龄化的决定性因素<sup>[3,4]</sup>。

我们最近通过一项为期 15 年的老年群居女性的队列研究，报道了在认知轨迹上的 3 个清晰的分类：有明显临床衰退的重度认知下降者；具有中度或“典型”衰退的轻度认知下降者；以及在整个过程中整体认知功能没有衰退表现的认知保留者<sup>[5]</sup>。我们发现，与轻度认知下降者相比，认知保留者似乎更少患有并发症，如糖尿病和高血压。另外，他们似乎更具有健康的

From the Departments of Psychiatry (K.Y., A.J.F.), Epidemiology and Biostatistics (K.Y., E.V., S.M.R., H.N.A.), Neurology (K.Y.), and Medicine (K.L.), School of Medicine, University of California, San Francisco; San Francisco Veterans Affairs Medical Center (K.Y.), CA; Clinical Research Branch (E.M.S.) and Laboratory of Epidemiology, Demography, and Biometry, Intramural Research Program (T.B.H.), National Institute on Aging, Baltimore, MD; Department of Epidemiology (A.B.N., C.R.), Graduate School of Public Health, Pittsburgh, PA; and Department of Preventive Medicine (S.S.), University of Tennessee Health Science Center, Memphis.

Funded by N01-AG-6-2101, N01-AG-6-2103, N01-AG-6-2106, and AG021918. Supported in part by the Intramural Research Program of the NIH, National Institute on Aging. K.Y. is supported in part by AG 031155 and an anonymous foundation. A.J.F. is supported by the CIHR Institute of Aging Fellowship Award.

Disclosure: The authors report no disclosures.

生活习惯,更少的在日常生活活动中面临困难,以及更少社会融入程度低的问题<sup>[5]</sup>。

这些发现不仅支持关于健康认知老龄化的假说,同时也进一步说明:与那些具有更典型的老龄相关认知下降的老年人相比,认知功能保留者具有不同的社会心理和行为学方面的特点。如何通过其它的变量来将这些人群区分出来尚不清楚。这些变量包括可能与认知老龄化相关的那些生物因素,如与炎症<sup>[6]</sup>、酶蛋白代谢<sup>[6]</sup>、以及与葡萄糖的调节<sup>[7]</sup>相关的一些指标。另外,由于在以往的研究中样本主要由白种女性组成,因此结果可能并不适用与普通人群。

本研究作为一项正在进行的涉及到两个种族的男性和女性的前瞻性队列研究的一部分,目的在于确定具有认知功能保留的老年人的比例,同时检查相关的综合性社会心理、健康、以及生物因素,这些因素也许能预测多年后的认知功能保留。健康认知老龄化的决定因素的确认,将可能不仅有助于形成健康老龄化的概念,同时也会影响预防策略。这将能确保老年人最佳的健康并阻止或延缓老年期的认知损害。

## 方法

### 研究人群

参与者均来自健康、老龄化和躯体组成(健康ABC)研究。该研究是一项前瞻性的队列研究,纳入了居住在孟斐斯、TN、匹兹堡、或PA混居人群中年龄在70-79岁的黑种或白种男性和女性。所有参与者均在1997年纳入。为了确认那些潜在的参与者,我们在指定的邮政编码区域内具有医疗保险的老年人中,随机抽取了一部分白人和黑人进行联系。参与者必须没有日常生活活动、步行1/4英里或爬10步台阶等方面的困难,才能符合要求。同时,他们还必须未患有威胁生命的癌症,并且在至少3年内没有搬离研究区域的计划。我们总共确认了22999例可能的参与者。其中8695名未能联系上,897名住在专门的机构、死亡、或已搬到其它地方,7250名不愿意参加,3082名不符合纳入标准,而3075名符合纳入标准。所有符合标准的参与者均填写了纸质的知情同意书,该知情同意书已经在临床研究点的伦理委员会认证。该研究已获得临床研究点和合作中心(加州大学,旧金山)伦理委员会的批准。关于健康ABC样本的细节描述之前已有报道<sup>[8]</sup>。

### 检测方法

认知测试 在基线(第1年)、以及2年后、4年后、7年后(第3年、5年、8年)的随访时,我们采用改良版的简易精神状态量表(Modified Mini-Mental State Examination, 3MS)对参与者进行检查。3MS是一个简短的、针对广泛认知领域的一组测试,包括对定向力、注意力、语言、行为以及短时和延迟记忆等部分的检查组成<sup>[9]</sup>。可能的分值为从0到100,且分值越高说明认知功能更好。

基线特征 基线的人口学特征包括年龄、性别以及种族。心理社会方面的特征包括自填的教育程度(按照<或≥高中教育程度进行分类)、参与者是否工作或志愿服务、是否为配偶或孩子提供照料、是否每周至少会拜访亲戚或朋友一次、他们是否觉得需要更多的社会支持、以及他们是独居还是与人合住。同时还采用了“成人读写能力快速评估的医学测试(the Rapid Estimate of Adult Literacy in Medicine test)”<sup>[10]</sup>这一个包括66个术语的词汇识别测试来判断参与者的读写能力是否达到了9级水平(相当与60分)或更高。

基线健康方面的特征包括自评的健康状态(采用好、很好或极好,以及一般或差进行分类)、目前抽烟状况、目前饮酒状况,以及每周中/高强度锻炼情况。我们将每周中/高强度锻炼定义为:在一周内至少有一次中/高强度的锻炼和活动(如有氧运动、负重练习或快步行走)的安排。我们采用了20项流调中心抑郁量表(20-item Center for Epidemiologic Studies-Depression Scale, CES-D)<sup>[11]</sup>对抑郁症状进行评估,得分大于15分的参与者将被分类为“具有高度的抑郁症状”。通过直接测量的身高和体重,计算身体质量指数(Body mass index, BMI)(kg/m<sup>2</sup>)。高血压定义为:自述有高血压的诊断、使用降压药、或测量的收缩压超过140mmHg、或测量的舒张压超过90mmHg。糖尿病被定义为:自述有糖尿病的诊断、使用降糖药物、或空腹血糖>126mg/dL、或餐后2h血糖>200mg/dL。而关于心肌梗死、卒中、或短暂性脑缺血发作(TIA),是通过自述曾获得医师的诊断来确认。

基线的生物学特征检查包括对APOE基因型的确定。我们采用标准的单核苷酸多态性分析(Bioserve.com, Laurel, MD)确定其基因型,并分析ε2和ε4等位基因存在或缺失。我们通过ELISA(R&D Systems, Minneapolis, MN)的方法检测细胞因子、C反应蛋白(C-reactive protein, CRP)、白介素(IL)-6、以及肿瘤坏死因子-α。同时,我们还

测量空腹血糖、总胆固醇、以及甘油三酯 (Johnson & Johnson, Vitros chemical methodology)。为了符合模型的假设和针对 SD 的统计分析,我们将细胞因子、血糖以及甘油三酯的测量结果进行了 log 转换。

### 统计分析

我们基于估算的从基线到第 8 年随访之间 3MS 得分的改变率,定义了 3 种认知组。为了确认认知功能保留的斜率,只有那些基线得分至少达到 80 分(没有临床认知缺损<sup>[10]</sup>)并有一次额外认知评估的参与者才被纳入。我们排除了 14 名在基线缺失 3MS 得分的参与者,313 名仅有一个认知测试得分的参与者,以及 239 名在基线 3MS 得分小于 80 分的参与者。剩下的 2509 名参与者被纳入了分析队列。被排除的参与者明显年龄更大,更倾向于男性、黑人、有并发症、而更少具有高中教育和第 9 级读写水平的人。

参与者特定的 3MS 分数的斜率是通过最佳线性非偏倚预测来评估的,后者是通过随机截距和斜率应用一线性混合模型获得的。预测斜率值在 0 或更高的参与者(意味着在观察期内无认知得分的改变或改善)被归类为认知保留者。而那些预测斜率值低于 0(在观察期内认知得分下降)但在斜率的平均数下不超于 1SD 的参与者被归类为轻度认知下降者。那些预测斜率得分在平均数下超过 1SD 的参与者被归类为重度认知下降者。

在认知组别的预测因素和种族之间未发现相互作用。也就是说,所有后续的分析都混合黑人和白人进行。认知组间各特征比较采用了二元分析,对连续变量进行方差分析,对分类变量进行  $\chi^2$  检验。通过一系列的多元 logistic 回归分析模型,针对认知保留组或重度下降组与轻度下降组计算了 OR 值和 95% 的可信区间 (CI)。该模型随后又对那些在二元分析中达到显著性  $P < 0.05$  水平的基线特征进行校正。所有的分析均采用了 Stata (Stata Corp, College Station, TX)。

### 结果

在 2509 名老年人中,758(30%)为认知保留者,1340(53%)为轻度认知下降者,411(16%)为重度认知下降者。每组中,3MS 得分在 7 年间的平均原始改变为认知保留组 1.0 (SE 0.02);轻度认知下降组 -2.2(SE 0.16);重度认知下降组 -9.0(SE 0.30)(图)。

将认知保留者与轻度认知下降者比较发

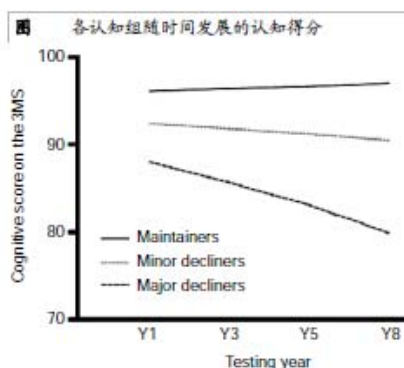

我们通过 7 年多改良简易精神状态筛查(3MS)得分的改变,确定了认知组,从而将参与者分为认知保留者(认知改变斜率 $\geq 0$ );轻度认知下降者(斜率 $< 0$ 且 $>$ 均数下 1SD);或重度认知下降者(斜率 $\leq$ 均数下 1SD)

现,年龄偏小的和白人更倾向于在多年后保留认知功能(表 1)。在社会心理方面,那些具有高中或更高教育水平和至少具有第 9 级读写水平的老年人更有可能为认知保留患者。那些在基线时工作或志愿服务的、没有照顾配偶或孩子、能获得足够的社会支持、以及与人合住的老年人更可能为认知保留者,而不是认知下降者。

在健康方面,评价自己的健康状况为好、非常好或极好(与一般或差比较)的参加者更可能为认知保留者,而不是认知下降者。同样,对于那些在基线每天饮酒量超过 1 杯,每周进行中/高强度锻炼,以及不吸烟的老年人也有类似的情况。那些 BMI 低、没有高血压、糖尿病和卒中的老年人也更可能为认知保留者(表 1)。

在生物学方面,不携带有 APOE  $\epsilon 4$  基因的参与者更可能为认知保留者,而不是认知下降者。那些 CRP、IL-6、空腹血糖水平低而甘油三酯水平高的参与者也更可能为认知保留者。

在二元模型中,重度认知下降更多见于高龄和黑人,少见具有高中以上文化程度、第 9 级读写水平的人,少见具有工作或服务以及具有足够的社会支持的人。在健康方面,重度认知下降者很少自述健康状态为好或非常好之类。他们诉及每日饮酒量较少,更少安排中/高强度的锻炼,且更倾向于诉及抑郁症状。基线的合并疾病包括高血压、糖尿病及卒中在重度认知下降组中更多见。最后,重度认知下降者更可能携带有 APOE

**表1** 2509名参与者认知组的预测因素

| 领域和特征                             | 认知保留者<br>(n=758) | 轻度认知下降<br>(n=1340) | 重度认知下降<br>(n=411) | P值     |
|-----------------------------------|------------------|--------------------|-------------------|--------|
| <b>人口学方面</b>                      |                  |                    |                   |        |
| 年龄, 岁, 平均值(±SD)                   | 73.0 (2.6)       | 73.6 (2.9)         | 74.3 (2.9)        | <0.001 |
| 女性, %                             | 55               | 51                 | 57                | 0.069  |
| 白种, %                             | 81               | 61                 | 44                | <0.001 |
| <b>社会心理, %</b>                    |                  |                    |                   |        |
| 教育≥高中                             | 95               | 79                 | 59                | <0.001 |
| REALM≥第9级                         | 97               | 77                 | 57                | <0.001 |
| 工作或志愿者                            | 67               | 58                 | 51                | <0.001 |
| 不是照料者                             | 81               | 76                 | 78                | 0.041  |
| 拜访家人或朋友                           | 91               | 89                 | 87                | 0.199  |
| 具有充足的社会支持                         | 77               | 74                 | 64                | <0.001 |
| 与人合住                              | 74               | 69                 | 86                | 0.007  |
| <b>健康方面</b>                       |                  |                    |                   |        |
| 自我健康评估好到很好, %                     | 94               | 86                 | 77                | <0.001 |
| 饮酒>1杯酒/天, %                       | 11               | 7                  | 3                 | <0.001 |
| 中度或剧烈的锻炼, %                       | 47               | 37                 | 33                | <0.001 |
| 目前不抽烟, %                          | 95               | 90                 | 91                | 0.001  |
| CES-D<16 (无抑郁), %                 | 97               | 96                 | 93                | 0.007  |
| BMI, kg/m <sup>2</sup> , 平均值(±SD) | 16.9 (4.5)       | 27.7 (4.7)         | 27.4 (5.2)        | 0.002  |
| 高血压, %                            | 57               | 62                 | 69                | 0.001  |
| 糖尿病, %                            | 17               | 24                 | 30                | <0.001 |
| MI病史, %                           | 9                | 12                 | 11                | 0.104  |
| 中风/TIA病史, %                       | 6                | 8                  | 11                | 0.007  |
| <b>生物标记</b>                       |                  |                    |                   |        |
| APOE ε4等位基因, %                    | 22               | 26                 | 43                | <0.001 |
| APOE ε2等位基因, %                    | 17               | 16                 | 14                | 0.282  |
| CRP, mg/mL, 平均值(±SD)              | 2.4 (3.3)        | 2.9 (4.3)          | 2.9 (3.6)         | 0.002  |
| IL-6, pg/mL, 平均值(±SD)             | 2.1 (1.7)        | 2.4 (1.9)          | 2.4 (1.7)         | <0.001 |
| TNF-α, pg/mL, 平均值(±SD)            | 3.3 (1.4)        | 3.4 (1.5)          | 3.5 (1.6)         | 0.290  |
| 甘油三酯, mg/dL                       | 145.6 (82.4)     | 138.7 (75.8)       | 129.0 (66.5)      | 0.001  |
| 总胆固醇, mg/mL, 平均值(±SD)             | 205.2 (38.1)     | 202.0 (39.2)       | 203.6 (36.6)      | 0.197  |
| 空腹血糖, mg/mL, 平均值(±SD)             | 99.6 (24.3)      | 104.7 (33.2)       | 105.5 (34.9)      | 0.001  |

\*P值: 连续变量来自方差分析、χ<sup>2</sup>检验; 分类变量来自Fisher精确概率法

#为行方差分析log转换

REALM=成人读写能力快速评估的医学测试; CES-D=流调中心抑郁量表; BMI=身体质量指数; MI=心肌梗死; CRP=C反应蛋白; IL=白介素; TNF=肿瘤坏死因子

ε4 基因、更倾向于较高的甘油三酯水平和空腹血糖水平。

在最后的多元校正模型中(表2), 认知保留者和轻度认知下降者组间比较仍然具有显著预测作用的特征包括: 年龄、白种人、具有高中或以上文化水平、第9级或以上读写水平、每周进行中/高强度锻炼、以及在基线时未吸烟等。在具有统计学意义的趋势分析水平(P<0.10), 认知保留与工作或服务、与人合住、以及没有APOE ε4基因有关。

在最后的多元模型中, 和轻度认知下降组比较, 能够显著预测重度认知下降的基线因素包括: 更大的年龄、具有高中以下的教育水平和第9级以下的读写水平、社会支持水平较低、以及具有APOE ε4基因(表2)。

在统计学意义的趋势分析水平(P<0.10), 重度认知下降与种族、BMI更高、糖尿病、以及高血压有关。

## 讨论

基于8年的整体认知功能改变的轨迹, 我们确认了3个独立的组: 认知保留组、轻度认知下降组、以及重度认知下降组。与以往大部分的研究不同, 本研究通过对一项涉及两个种族老年男性和女性的前瞻性队列研究认知功能的改变轨迹, 系统地评价了认知保留或健康认知老龄化的预测因素。

有意义的结果是我们确认了几个可改变的健康认知老龄化的预测因素。行为因素包括锻炼、吸烟、以及志愿服务这些可改变的

**表2** 认知保留者或重度认知下降者之间相似性: 多因素分析结果

| 特征                     | 认知保留 vs               | 重度认知下降 vs             |
|------------------------|-----------------------|-----------------------|
|                        | 重度认知下降<br>OR (95% CI) | 轻度认知下降<br>OR (95% CI) |
| 年龄, 每5年                | 0.65 (0.55-0.77)      | 1.70 (1.38-2.11)      |
| 白种人                    | 1.72 (1.30-2.28)      | 0.76 (0.55-1.04)      |
| 教育≥高中                  | 2.75 (1.78-4.26)      | 0.52 (0.37-0.72)      |
| REALM≥第9级              | 4.85 (3.00-7.87)      | 0.70 (0.50-0.98)      |
| 工作或志愿者                 | 1.24 (0.99-1.54)      | 0.96 (0.73-1.25)      |
| 不是照料者                  | 1.22 (0.94-1.58)      | 1.06 (0.78-1.44)      |
| 具有充足的社会支持              | 0.94 (0.73-1.21)      | 0.69 (0.51-0.91)      |
| 与人同住                   | 1.24 (0.98-1.57)      | 1.00 (0.75-1.34)      |
| 自我健康评估好到最好             | 1.39 (0.92-2.11)      | 0.80 (0.56-1.14)      |
| 饮酒>1杯酒/天               | 1.33 (0.91-1.93)      | 0.67 (0.36-1.27)      |
| 中度或剧烈的锻炼               | 1.31 (1.06-1.62)      | 0.97 (0.73-1.28)      |
| 目前不抽烟                  | 1.84 (1.14-2.97)      | 1.15 (0.72-1.84)      |
| CES-D<16 (无抑郁)         | 1.23 (0.68-2.22)      | 0.70 (0.38-1.29)      |
| BMI, kg/m <sup>2</sup> | 0.99 (0.96-1.02)      | 0.97 (0.94-1.00)      |
| 高血压                    | 1.03 (0.83-1.28)      | 1.29 (0.97-1.73)      |
| 糖尿病                    | 0.91 (0.64-1.30)      | 1.35 (0.92-2.00)      |
| 中风/TIA病史               | 0.72 (0.46-1.13)      | 1.07 (0.67-1.72)      |
| APOE ε4等位基因            | 0.80 (0.62-1.02)      | 2.31 (1.75-3.05)      |
| CRP, 每SD               | 0.93 (0.81-1.07)      | 1.03 (0.88-1.20)      |
| IL-6, 每SD              | 0.98 (0.88-1.09)      | 0.97 (0.83-1.12)      |
| 甘油三酯, 每SD              | 0.91 (0.77-1.08)      | 0.97 (0.84-1.12)      |
| 空腹血糖, 每SD              | 0.91 (0.77-1.08)      | 0.93 (0.79-1.10)      |

\*参照组是轻度认知下降者; 以上列出的所有特征均在模型中获得校正  
OR=比值比; CI=置信区间; REALM=成人读写能力快速评估的医学测试; CES-D=流调中心抑郁量表; BMI=身体质量指数; CRP=C反应蛋白; IL=白介素

因素。这些因素可能被用于确保在老年期具有最佳的认知功能。老年时的志愿服务在认知保留者中更多见, 并已显示能降低死亡率和增加个人的健康体验<sup>[13]</sup>。志愿服务是通过增加社交网络、可获得的资源、情感上的满足等带来益处<sup>[14]</sup>。在目前研究中, 认知保留者也更少见独居, 强调了老年期社交潜在的重要性。

与轻度认知下降者相比, 认知保留者似乎更多地进行中/高强度的锻炼。从认知功能的角度来看, 有研究显示在60-79岁久坐的老年人中, 有氧锻炼的训练一次就可以增加脑容量<sup>[15]</sup>。此外, 在一些前瞻性和病例对照的研究中均报道了在老年期躯体健身对认知功能的提高作用<sup>[16-18]</sup>。这些发现与本研究一起均强调了在老年期躯体功能对后些年认知保留的重要性。

有假说认为代谢失调可能加速大脑老化。这些代谢失调包括慢性炎症、氧化应激以及葡萄糖代谢失调<sup>[19-21]</sup>。有趣的是与生活方式改变相结合的干预措施, 如戒烟、锻炼、适当的营养等, 可能会改变一些生物因素<sup>[22]</sup>,

从而反过来可以在老年期保留认知功能<sup>[23-24]</sup>。令人惊讶的是, 在认知保留者和轻度认知下降者之间, 生物标记物并没有显著性差异。可能由于两个认知组的特性或在调查中的其它因素干扰(如每周的中/高强度的锻炼), 使得生物标记物的影响被削弱。

除了生活方式的改变以外, 干预措施最近集中在建立个人的认知储备能力方面。认知储备是指由于可选择神经网络或认知对策两者的最大化所致的与年龄相关的神经退行性疾病临床表现的恢复力<sup>[25]</sup>。曾有报道认为认知储备是由先天的智力和外在的经历所决定, 后者包括所获得的教育<sup>[26]</sup>。在本研究中发现所获得的教育在认知保留组中更高。其实, 在既往的研究中已经表明, 教育水平和读写能力过低与更重的认知损害和痴呆危险增加有关<sup>[27,28]</sup>。值得注意的是, 在最后校正模型中, 教育水平和读写能力分别能独立预测认知保留, 提示这两种因素在认知功能保留中扮演着不同的角色。教育和读写能力的作用可能也能解释在种族和认知保留之间存在的相关性。尽管在这一研究中, 我们在统计时对教育和读写能力进行了控制, 但是我们也不能排除可能对认知储备也有作用的混杂因素存在。然而, 重要的是, 有研究表明在老年期可以提高认知储备<sup>[29,30]</sup>。认知训练不仅能改善认知功能, 还能导致神经活动更加有效<sup>[31]</sup>。并且这种认知训练不仅仅是短暂的刺激反应, 还能产生长期的作用<sup>[34,35]</sup>。

在此我们需要注意一个有趣的现象: 重度认知下降的预测因素可能与认知保留的预测因素稍有不同。比如: 与重度认知下降相比, 工作或做志愿者、进行中/高强度的锻炼、戒烟等行为因素似乎对认知保留更有预测作用。这些预测作用上的区别, 在健康老龄化的概念内, 对认知老龄化的干预与治疗措施的制定具有重要的影响。

本研究一重要的优势在于能够基于多年来参与者的认知轨迹来定义各认知组。与既往一些横断面研究定义大力建议临床认知损害豁免不同, 这一方法是通过纵向的表现定义了健康老龄化。我们首要的目的是调查那些能将认知保留者从典型与年龄相关的认知下降者区别开的因素。此外, 我们还明确了那些决定重度认知下降的因素, 如APOE ε4基因的存在。并且, 健康ABC研究提供了

范围较广基线特征,从而有助于对各个领域因素进行调查。最后,由于此队列研究包括了来自于黑人和白人的男性和女性,因此结论也可以推广到功能健康的普通老年人群。本调查的一个潜在的局限性是选择偏倚。队列研究只能大致代表相对功能健康的70~79岁之间的人。因此,与功能健康较差的样本相比,本研究的认知保留比例可能会高些。另一个局限性在于,我们在定义3个认知组时仅关注于整体的认知功能。随着年龄增加,并不是所有的认知功能均以同样的速度下降,关于这点已被很好的证实。因此,在未来的研究在对老年人群的认知轨迹进行定义时,应该采用一组认知测试。

综上所述,这些结果提示老年人群中存在一个亚型,该亚型是基于多年后认知功能的保留,而被认为是健康老年人。由于可能发展为痴呆的人群和所导致的社会成本预计呈指数级扩大,对促进老年人最佳认知功能机制的调查和了解更加重要。本研究表明,认知保留者具有独特的特点。组成这些特点的一些因素是可以改变的。这些特点将认知保留者同那些经历与年龄相关典型的认知下降的大多数老年人区分开来。

需要进一步的研究来重复目前的发现,同时扩展健康认知老龄化的潜在的预测因素。并且,进一步的研究应该与影像技术结合,从而评估随时间发展认知保留和脑功能/形态学的相互关系。对最佳认知功能预测因素的阐明将有助于那些老年痴呆发生或延缓疾病的进程的的措施的发展。这种模型将不仅会减少对社会所造成的消耗,同时会确保老年期生活质量的提高。

### 参考文献

- Rowe JW, Kahn RL. Human aging: usual and successful. *Science* 1987;237:143-149.
- Depp CA, Jeste DV. Definitions and predictors of successful aging: a comprehensive review of larger quantitative studies. *Am J Geriatr Psychiatry* 2006;14:6-20.
- Habib R, Nyberg L, Nilsson LG. Cognitive and noncognitive factors contributing to the longitudinal identification of successful older adults in the Betula Study. *Neuropsychol Dev Cogn B Aging Neuropsychol Cogn* 2007;14:257-273.
- Engelhart MJ, Goertlings MI, Meijer J, et al. Inflammatory proteins in plasma and the risk of dementia: The Rotterdam Study. *Arch Neurol* 2004;61:668-672.
- Barnes DE, Cauley JA, Lui LY, et al. Women who maintain optimal cognitive function into old age. *J Am Geriatr Soc* 2007;55:259-264.
- Yaffe K, Barrett-Connor E, Lin F, Grady D. Serum lipoprotein levels, statin use, and cognitive function in older women. *Arch Neurol* 2002;59:378-384.
- Kanaya AM, Barrett-Connor E, Gildengorin G, Yaffe K. Change in cognitive function by glucose tolerance status in older adults: a 4-year prospective study of the Rancho Bernardo study cohort.

- Arch Intern Med 2004;164:1327-1333.
- Rooks RN, Simonick EM, Miles T, et al. The association of race and socioeconomic status with cardiovascular disease indicators among older adults in the health, aging, and body composition study. *J Gerontol* 2002;57:S247-256.
- Teng EL, Chiu HC. The Modified Mini-Mental State (3MS) examination. *J Clin Psychiatry* 1987;48:314-318.
- Davis TC, Long SW, Jackson RH, et al. Rapid estimate of adult literacy in medicine: a shortened screening instrument. *Fam Med* 1993;25:391-395.
- Radloff L. The CES-D scale: a self-report depression scale for research in the general population. *Appl Psychol Meas* 1977;1:385-401.
- Harris AH, Thomson CE. Volunteering is associated with delayed mortality in older people: analysis of the longitudinal study of aging. *J Health Psychol* 2005;10:739-752.
- Pilavin JA, Siegel E. Health benefits of volunteering in the Wisconsin longitudinal study. *J Health Soc Behav* 2007; 48:450-464.
- Moon P, Dempster-McClain D, Williams R. Successful aging: a life-course perspective on women's multiple roles and health. *Am J Sociol* 1992;97:1612-1638.
- Colcombe SJ, Erickson KI, Scalf PE, et al. Aerobic exercise training increases brain volume in aging humans. *J Gerontol A Biol Sci Med Sci* 2006;61:1166-1170.
- Yaffe K, Barnes D, Nevitt M, Lui LY, Covinsky K. A prospective study of physical activity and cognitive decline in elderly women: women who walk. *Arch Intern Med* 2001; 161:1703-1708.
- Kramer AF, Erickson KI, Colcombe SJ. Exercise, cognition, and the aging brain. *J Appl Physiol* 2006;101:1237-1242.
- Barnes DE, Yaffe K, Satariano WA, Tager IB. A longitudinal study of cardiorespiratory fitness and cognitive function in healthy older adults. *J Am Geriatr Soc* 2003;51:459-465.
- Yaffe K, Blackwell T, Kanaya AM, Davidowitz N, Barrett-Connor E, Knusger K. Diabetes, impaired fasting glucose, and development of cognitive impairment in older women. *Neurology* 2004;63:658-663.
- Schmidt R, Schmidt H, Curb JD, Masaki K, White LR, Launer LJ. Early inflammation and dementia: a 25-year follow-up of the Honolulu-Asia Aging Study. *Ann Neurol* 2002;52:168-174.
- Nunomura A, Castellani RJ, Zhu X, Moreira PI, Perry G, Smith MA. Involvement of oxidative stress in Alzheimer disease. *J Neuropathol Exp Neurol* 2006;65:631-641.
- Tuomilehto J, Lindstrom J, Eriksson JG, et al. Prevention of type 2 diabetes mellitus by changes in lifestyle among subjects with impaired glucose tolerance. *N Engl J Med* 2001;344:1343-1350.
- Ferrara CM, Goldberg AP, Ortmeyer HK, Ryan AS. Effects of aerobic and resistive exercise training on glucose disposal and skeletal muscle metabolism in older men. *J Gerontol A Biol Sci Med Sci* 2006;61:480-487.
- Menelly GS, Cheung E, Tenster D, Yakura C, Tuokko H. The effect of improved glycemic control on cognitive functions in the elderly patient with diabetes. *J Gerontol* 1993; 48:M117-121.
- Stem Y. The concept of cognitive reserve: a catalyst for research. *J Clin Exp Neuropsychol* 2003;25:589-593.
- Hultsch DF, Hertzog C, Small BJ, Dixon RA. Use it or lose it: engaged lifestyle as a buffer of cognitive decline in aging? *Psychol Aging* 1999;14:245-263.
- Stem Y, Gurland B, Tatemichi TK, Tang MX, Wilder D, Mayeux R. Influence of education and occupation on the incidence of Alzheimer's disease. *JAMA* 1994;271:1004-1010.
- Manly JJ, Touradji P, Tang MX, Stem Y. Literacy and memory decline among ethnically diverse elders. *J Clin Exp Neuropsychol* 2003;25:680-690.
- Shihabuddin LS, Palmer TD, Gage FH. The search for neural progenitor cells: prospects for the therapy of neurodegenerative disease. *Mol Med Today* 1999;5:474-480.
- Gage FH. Neurogenesis in the adult brain. *J Neurosci* 2002;22:612-613.
- Bherer L, Kramer AF, Peterson MS, Colcombe S, Erickson K, Becic E. Testing the limits of cognitive plasticity in older adults: application to attentional control. *Acta Psychol* 2006;123:261-278.
- Bherer L, Kramer AF, Peterson MS, Colcombe S, Erickson K, Becic E. Training effects on dual-task performance: are there age-related differences in plasticity of attentional control? *Psychol Aging* 2005;20:695-709.
- Erickson KI, Colcombe SJ, Wadhwa R, et al. Training-induced plasticity in older adults: effects of training on hemispheric asymmetry. *Neurobiol Aging* 2007;28:272-283.
- Willis SL, Nesselroade CS. Long-term effects of fluid ability training in old-old age. *Developmental Psychology* 1990;26:905-910.
- Ball K, Berch DB, Helmers KF, et al. Effects of cognitive training interventions with older adults: a randomized controlled trial. *JAMA* 2002;288:2271-2281.
- Brookmeyer R, Gray S, Kawas C. Projections of Alzheimer's disease in the United States and the public health impact of delaying disease onset. *Am J Public Health* 1998;88:1337-1342.
